# Supplementary material for: Structural and functional basis of mammalian microRNA biogenesis by Dicer
Source: PubMed Central journal article supplement (PMC9645528; doi:10.1016/j.molcel.2022.10.010), 2022-11-03
Supplement: mmc1.pdf [file mmc1.pdf]

**Molecular Cell, Volume 82**

**Supplemental information**

**Structural and functional basis of mammalian**

**microRNA biogenesis by Dicer**

**David Zapletal, Eliska Taborska, Josef Pasulka, Radek Malik, Karel Kubicek, Martina Zanova, Christian Much, Marek Sebesta, Valeria Buccheri, Filip Horvat, Irena Jenickova, Michaela Prochazkova, Jan Prochazka, Matyas Pinkas, Jiri Novacek, Diego F. Joseph, Radislav Sedlacek, Carrie Bernecky, Dónal O'Carroll, Richard Stefl, and Petr Svoboda**

## Supplemental information

Supplemental information includes the following material:

### Figures

Figure S1 - Production and validation of Dicer mouse mutants.

Figure S2 - Phenotype of *Dicer*<sup>ΔHELI/ΔHELI</sup> mouse mutants.

Figure S3 - miRNome dysregulation in *Dicer*<sup>ΔHELI/ΔHELI</sup> mouse mutants

Figure S4 - Purification and cryo-EM analyses of apo-Dicer.

Figure S5 - Purification and cryo-EM analyses of Dicer–pre-miR-15a complex.

Figure S6 - Reconstitution and cryo-EM analyses of Dicer<sup>O</sup>–pre-miR-15a complex.

Figure S7 - Reconstitution and cryo-EM analysis of Dicer–pre-miR-15a–TARBP2 complex.

### Tables

Table S2 - Expression of host genes of most upregulated mirtrons in ESCs

Table S3 - Asymmetric cleavage of miRNAs

Table S4 - Cryo-EM data collection and refinement statistics

Table S5 - RNA-seq libraries

Table S1 - miRNA expression in mutants is provided in a non-PDF format separately

## Supplementary Figures

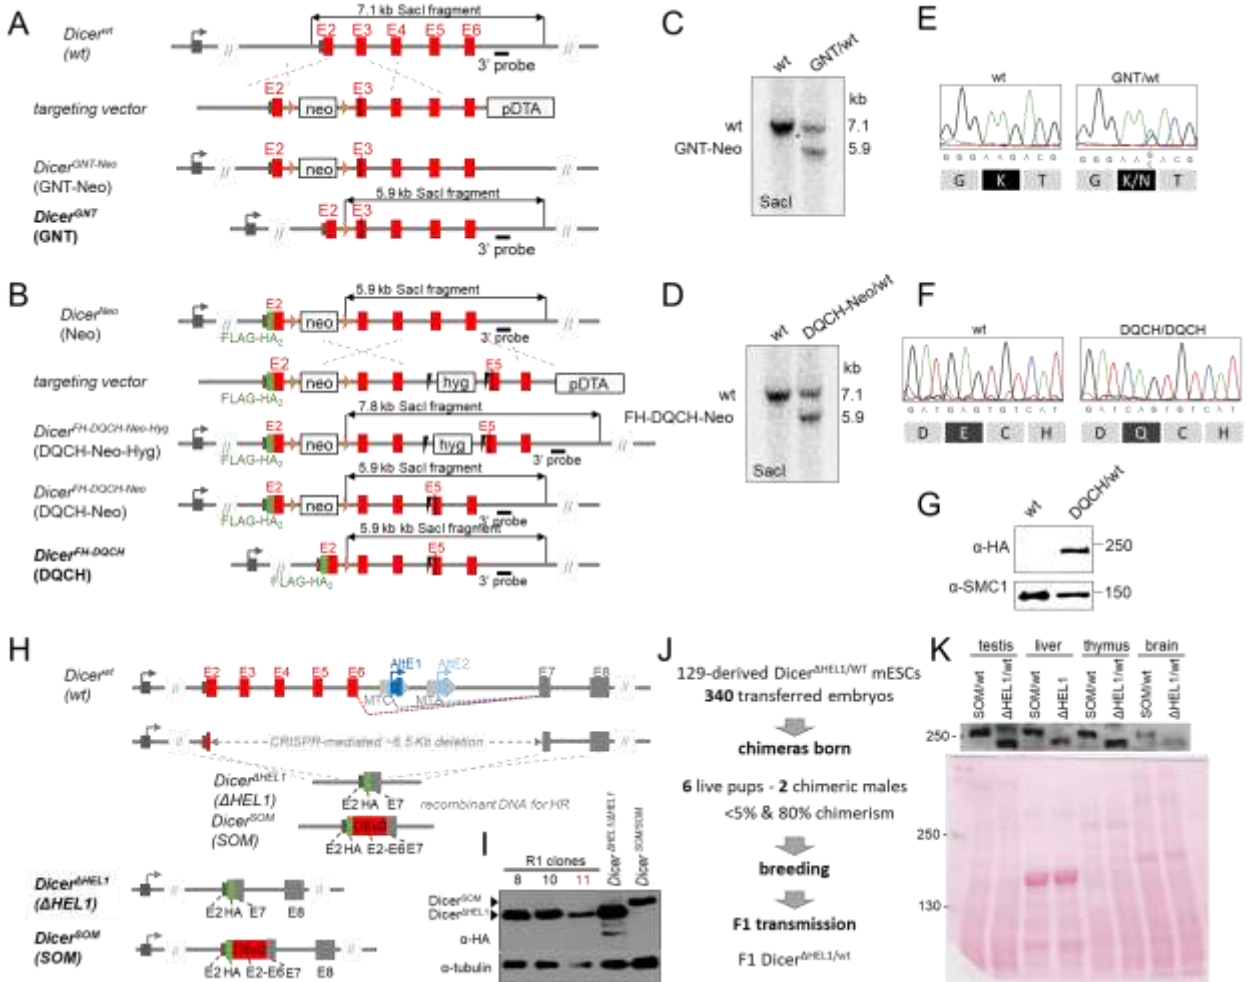

**Figure S1** Production and validation of *Dicer* mouse mutants. Related to Figure 1A. (A, B) Schematic depiction of introduction of the GNT and the DQCH mutation into endogenous *Dicer* gene, respectively. (C) Detection of the GNT and (D) DQCH alleles by Southern blotting. (E, F) Validation of the mutated alleles by Sanger sequencing. (G) Western blot demonstrating expression of the mutated *Dicer*<sup>DQCH</sup> protein. (H) Schematic depiction of engineering of *Dicer*<sup>ΔHEL1</sup> (ΔHEL1) and *Dicer*<sup>SOM</sup> (SOM) in the genomic sequence encoding HEL1 of the endogenous *Dicer* gene. Briefly, a fragment from exon 2 to exon 7 was removed using CRISPR/Cas9 and recombined with a *Dicer*<sup>ΔHEL1</sup> recombination construct carrying exon 2 (5' UTR and start codon), HA-tag, and exon 7 coding sequence. *Dicer*<sup>SOM</sup>, which was produced using the same strategy, was described previously<sup>1</sup>. Both alleles were validated by sequencing. (I) Western blotting of selected positive clones using anti-HA antibody, tubulin was used as a loading control. The heterozygous line 11 gave rise to *Dicer*<sup>ΔHEL1</sup> mice. (J) Outline of the *Dicer*<sup>ΔHEL1</sup> mouse strain production process. (K) Western blot analysis of *Dicer*<sup>ΔHEL1</sup> expression in different tissues of a heterozygote *Dicer*<sup>ΔHEL1/wt</sup> mouse. Tissues from *Dicer*<sup>SOM/wt</sup> mouse were used for comparison. 80 μg of total protein lysate were loaded per lane. Ponceau staining of the membrane shown below provides control for equal loading.

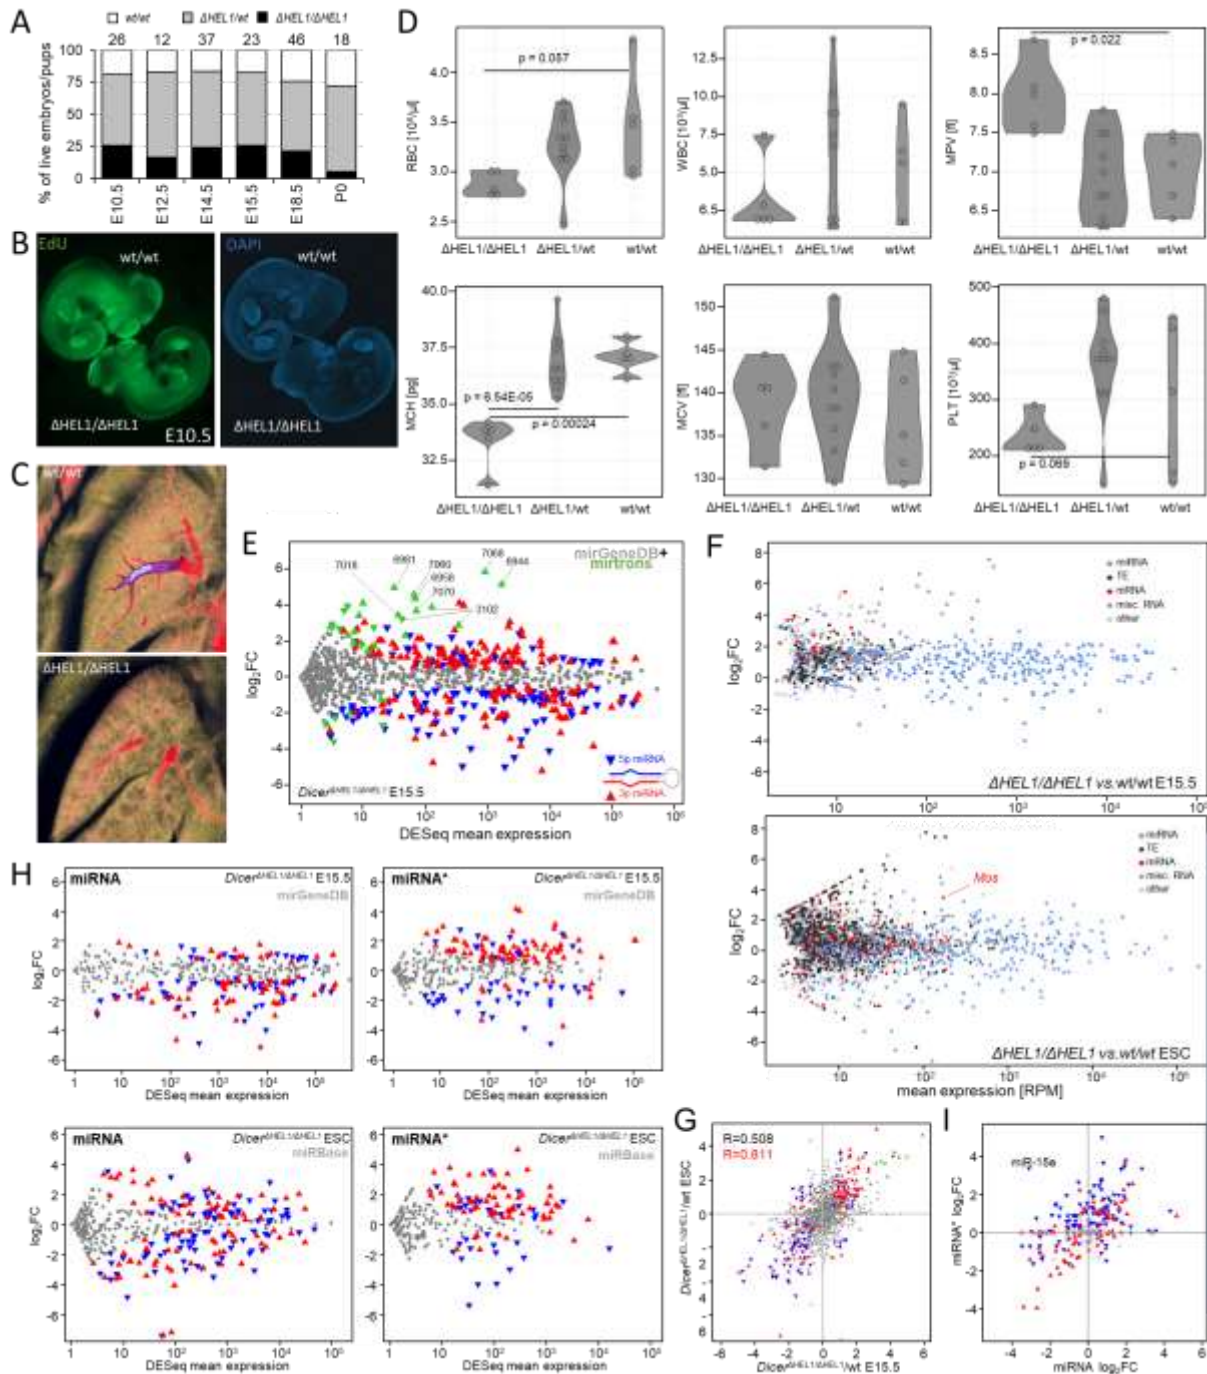

**Figure S2 Phenotype of *Dicer*<sup>ΔHEL1/ΔHEL1</sup> mouse mutants.** Related to Figure 1 and 2 (A) Genotype segregation in embryos from *Dicer*<sup>ΔHEL1/wt</sup> parents. *Dicer*<sup>ΔHEL1/ΔHEL1</sup> embryos survive until birth but die soon after. (B) A combined EdU and DAPI staining of E10.5 embryos shows no apparent difference in general proliferation pattern suggesting more specific mechanism beyond the growth retardation phenotype. The experiment was performed twice with the same result. (C) MicroCT scans of lungs from E18.5 embryos. False coloring reveals reduced airway development and branching (red and purple colors) in *Dicer*<sup>ΔHEL1/ΔHEL1</sup> embryos. For each genotype a section with the highest signal was selected in corresponding anatomical positions. Scale bar = 5mm. (D) Defects in hematopoiesis found in *Dicer*<sup>ΔHEL1/ΔHEL1</sup> mice. Shown are: red blood cell count per  $\mu$ l (RBC, reduced by 17%), mean red blood cell volume (MCV), mean hemoglobin per cell (MCH, reduced by 10%), platelet count per  $\mu$ l (PLT), mean platelet volume (MPV), and white blood cell count (WBC) per  $\mu$ l. (E) Differential expression of miRNAs is not an artifact of using miRBase annotation. MA plot shows differentially-expressed high-confidence annotated murine miRNAs from mirGeneDB database<sup>2</sup>, which reveals highly similar miRNA dysregulation as shown in Fig. 2H except of mirtrons, which are not included in the mirGeneDB and had to be analyzed separately using mirtron annotation by Ladewig et al.<sup>3</sup>. Significantly

dysregulated 5p and 3p miRNAs (DESeq p-value 0.05) are shown as oriented blue ▼ and red ▲ triangles, respectively. Mirtrons are represented by green triangles whose orientation is the same as that of significantly dysregulated 5p and 3p miRNAs. Three embryos with the wild type and five with the mutant genotype were used. (F) Effect of *Dicer*<sup>ΔHEL1</sup> expression on small RNAs in E15.5 embryos and in ESCs. Each MA plot shows results of small RNA-seq analysis of a *Dicer*<sup>ΔHEL1/ΔHEL1</sup> sample compared with the normal control (wild-type siblings or the parental ESC line). Each colored point represents a genomic region (cluster) producing 21-23 nt RNAs. Clusters were identified and categorized by a previously developed algorithm<sup>4</sup>. Cluster “expression” is defined as a fraction of small RNA reads mapping to it per million 21-23 nt small RNAs (RPM). (G) Relative changes of significantly differentially expressed miRNAs in *Dicer*<sup>ΔHEL1/ΔHEL1</sup> E15.5 embryos (shown as colored triangles, other miRNAs are depicted as grey circles) correlate with changes of these miRNAs in *Dicer*<sup>ΔHEL1/ΔHEL1</sup> ESCs. Axes depict log<sub>2</sub>FC. (H) Unique 3p passenger strand bias in *Dicer*<sup>ΔHEL1/ΔHEL1</sup> samples (upper two MA plots) or embryonic stem cell mutants (lower two MA plots) is reproducible when using a mirGeneDB miRNA annotation. MA plots depict relative changes of dominant miRNAs (left) and passenger strands (miRNA\*, right) in *Dicer*<sup>ΔHEL1/ΔHEL1</sup> mutants. 5p and 3p origins of significantly changed miRNAs or miRNA\*s are distinguished by color and triangle orientation as depicted. (I) Relative changes of dominant miRNAs and their passenger strands in *Dicer*<sup>ΔHEL1/ΔHEL1</sup> ESCs. Each triangle depicts the strand (5p or 3p) of the dominant miRNA, its position corresponds to relative changes of the dominant miRNA (x-axis) and its corresponding miRNA\* (y-axis). Deep color indicates significantly dysregulated miRNAs.



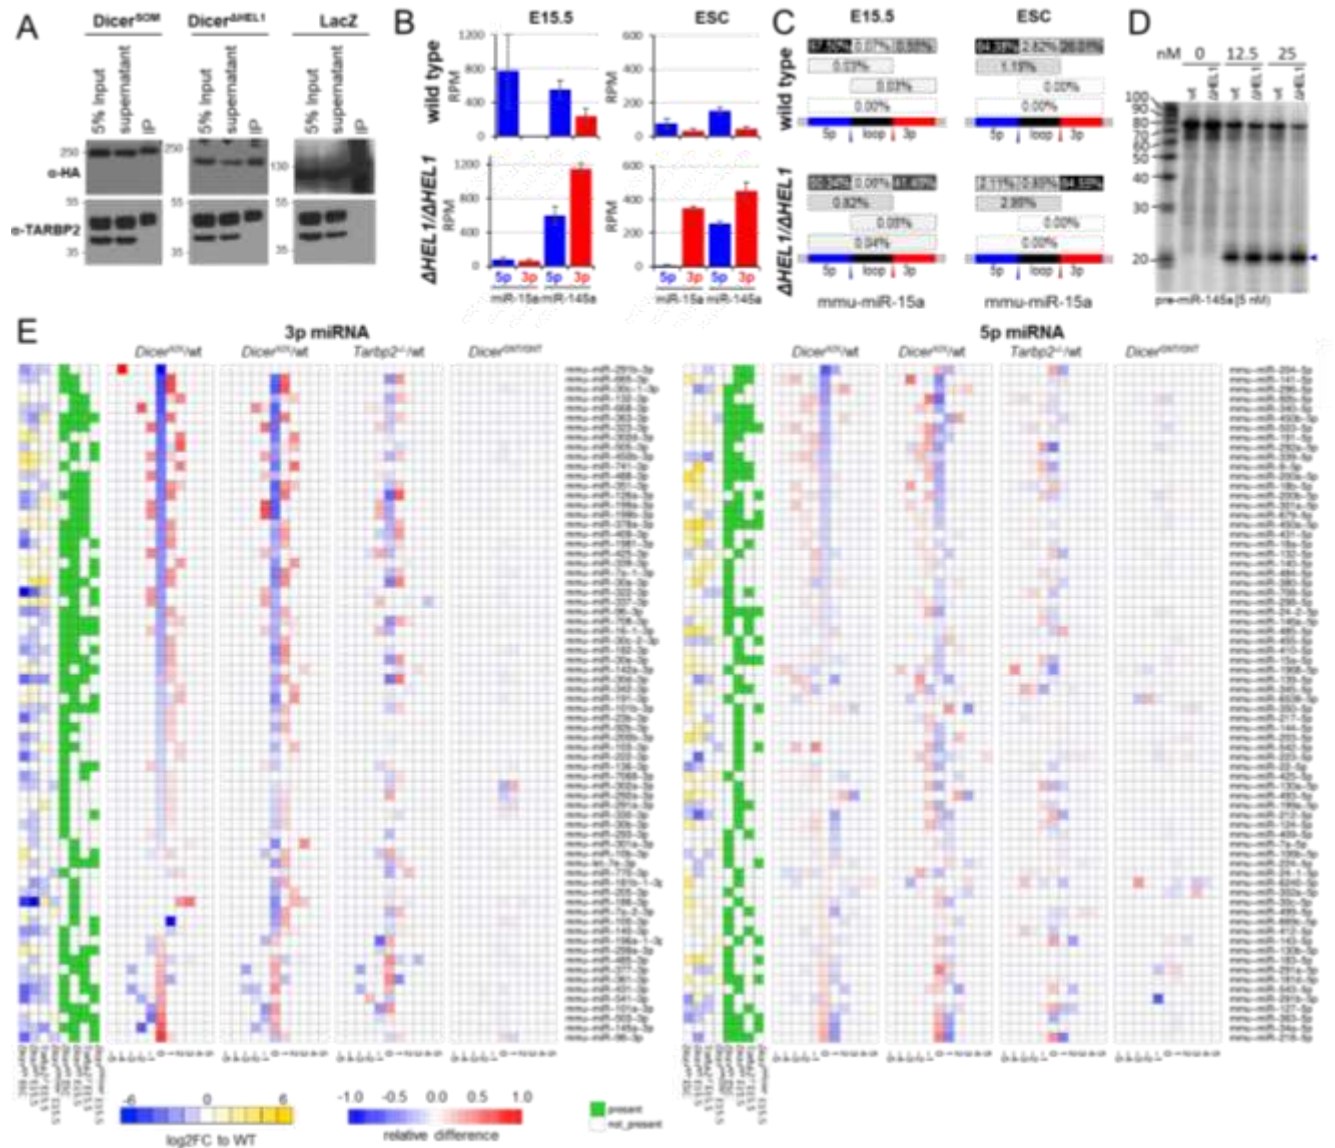

**Figure S3 miRNome dysregulation in *Dicer*<sup>ΔHEL1/ΔHEL1</sup> mouse mutants.** Related to Figure 3. (A) TARBP2 binds *Dicer*<sup>ΔHEL1</sup>. The western blots show TARBP2 presence in immunoprecipitates of *Dicer*<sup>SOM</sup> and *Dicer*<sup>ΔHEL1</sup> isoforms. HA-tagged *Dicer*<sup>SOM</sup> or *Dicer*<sup>ΔHEL1</sup> transiently expressed in NIH 3T3 cells were immunoprecipitated with α-HA antibody, and were analyzed by western blotting. The lower band in bottom western blots is a TARBP2 isoform, which does not interact with *Dicer*. (B) Expression of miR-15a and miR-145a miRNAs in *Dicer*<sup>ΔHEL1/ΔHEL1</sup> and *Tarbp2*<sup>-/-</sup> mutants. Expression is shown in reads per million (RPM) of 19-25 nt RNA fragments. Error bars = SD. (C) Products of asymmetric cleavage of pre-miR-15a are detectable in RNA-seq data from E15.5 and ESC samples. The blue-black-red lines at the bottom of each panel represent genomic pre-miRNA sequence with 5p miRNA, loop and 3p miRNA. *Dicer* cleavage positions are depicted by blue (3' end of 5p miRNA) and red (5' end of 3p miRNA) arrowheads. Above are shown RNA fragments corresponding to pre-miRNA, mature miRNAs, the loop, and fragments cleaved only at the 3' of 5p miRNA or 5' of 3p miRNA. Numbers correspond to percentages observed in RNA-seq data from ESCs. (D) miR-145a *in vitro* cleavage assay. 5 nM of *in vitro* synthesized P<sup>32</sup> 5'-end labeled pre-miRNA were incubated with indicated concentrations of recombinant *Dicer* variants at 37°C for 60 minutes, resolved by PAGE, and visualized by phosphorimaging. Blue and red arrowheads point to products corresponding to cleavage sites giving rise to 5p and 3p miRNA, respectively. (E) Cleavage fidelity in *Dicer*<sup>ΔHEL1/ΔHEL1</sup> mouse mutants. Heatmaps depict analysis of cleavage sites at the 5' end of 3p miRNAs (left heatmap) and 3' end of 5p miRNAs (right heatmap) in 50 most affected miRNAs among all miRNAs (>100 DESeq RPMs) in *Dicer*<sup>ΔHEL1/ΔHEL1</sup> E15.5 embryos and ESCs. At the center is the annotated cleavage site. Each column of squares represents one nucleotide from the cleavage site in direction into the mature miRNA (to the right) or upstream of it (to the left). Red-blue colors indicate relative changes in a miRNA cleavage site relative to the wild type sample.

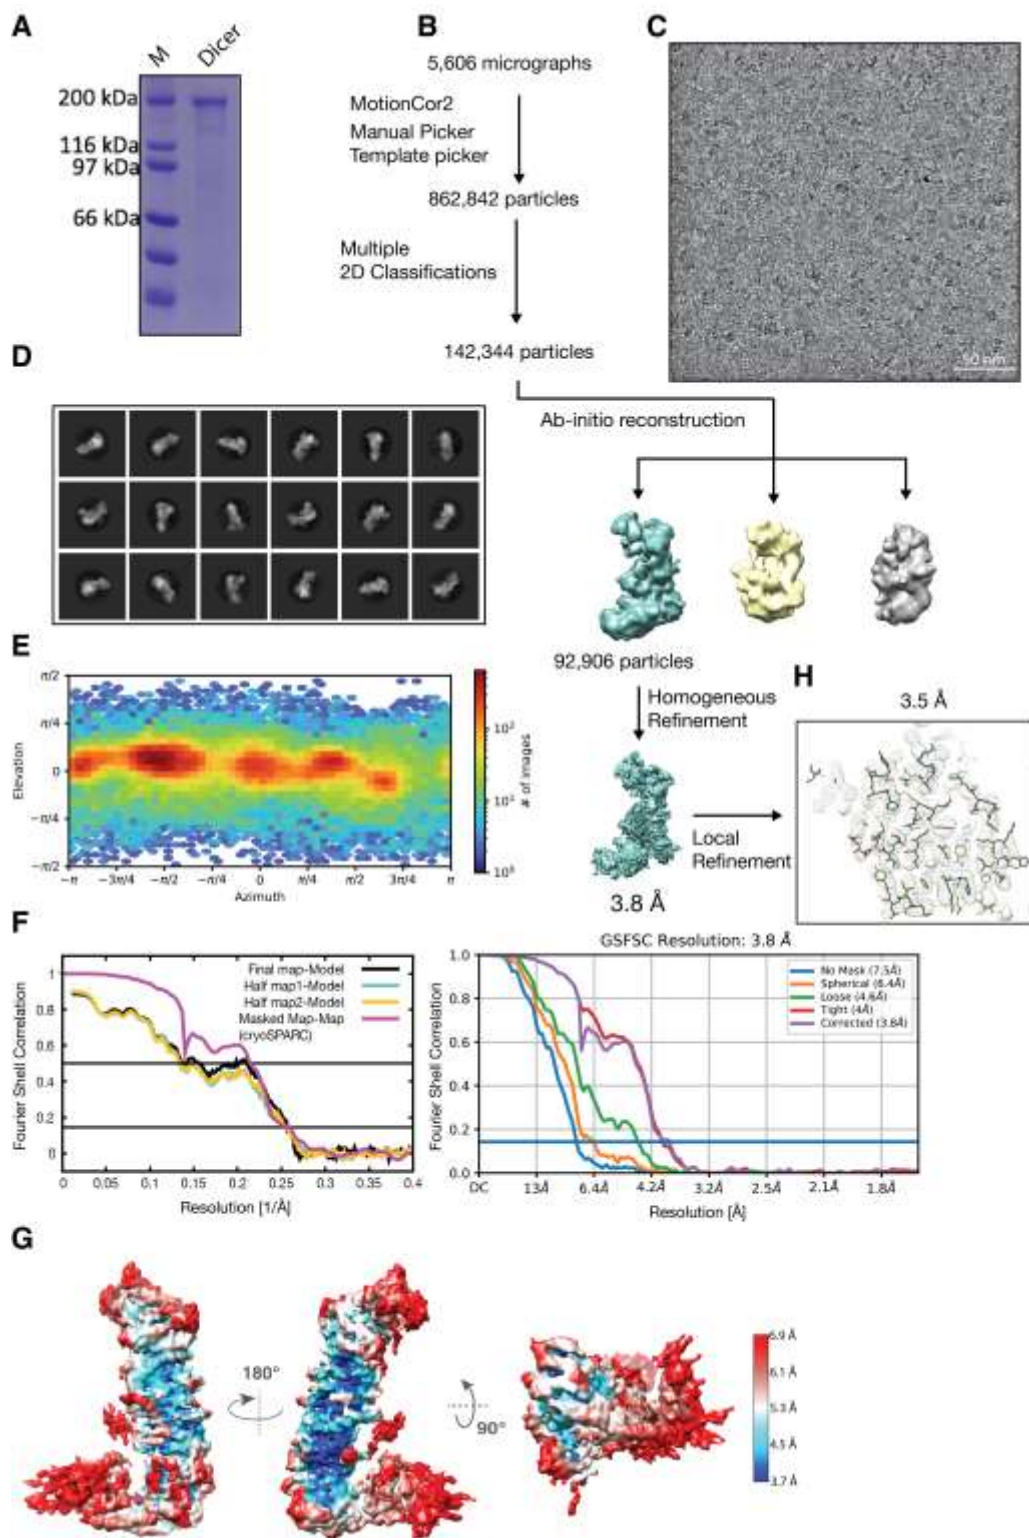

**Figure S4 Purification and cryo-EM analyses of apo-Dicer.** Related to Figure 4B (A) SDS-page analysis of apo-Dicer. (B) Outline of the image processing steps used to obtain the 3.8-Å-resolution cryo-EM reconstruction of apo-Dicer. 3D classes with no density of the helicase domain (due to inherent flexibility) were not used for the final reconstruction. (C) Representative Cryo-EM micrograph of apo-Dicer. (D) Gallery of reference-free 2D class averages. (E) Heat map for distribution of particles for the final 3D reconstruction. (F) Final map FSC (magenta) and map-to-model FSC for the full map (black), half map 1 (cyan), half map 2 (gold) curves (left). FSC curves and resolutions calculated in cryoSPARC during final refinement before and after applying soft masks (right). (G) Local resolution map of the final 3D reconstruction. (H) cryo-EM map from local refinement and fitting of coordinates.



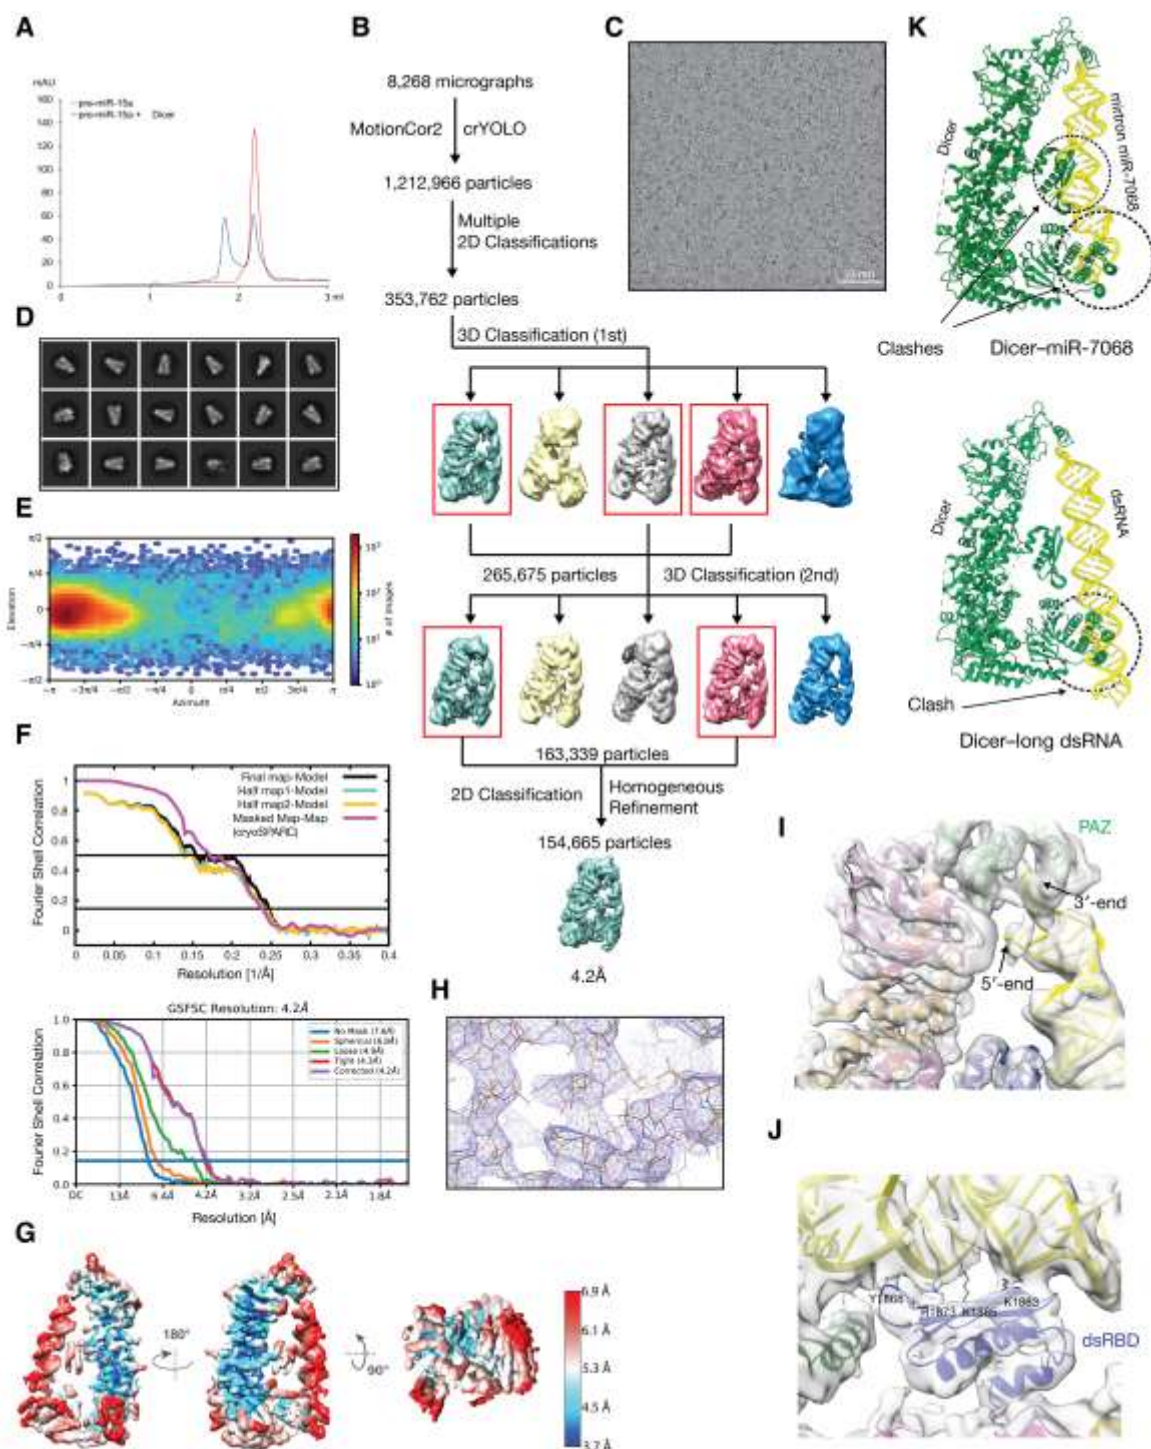

**Figure S5 Purification and cryo-EM analyses of Dicer-pre-miR-15a complex.** Related to Figure 4C (A) Gel filtration analysis of Dicer-pre-miR-15a complex. (B) Outline of the image processing steps used to obtain the 4.2-Å-resolution cryo-EM reconstruction of the Dicer-pre-miR-15a complex. (C) Representative cryo-EM micrograph of the Dicer-pre-miR-15a complex. (D) Gallery of reference-free 2D class averages. (E) Heat map for distribution of particles for the final 3D reconstruction. (F) Final map FSC (magenta) and map-to-model FSC for the full map (black), half map 1 (cyan), half map 2 (gold) curves (top). FSC curves and resolutions calculated in cryoSPARC during final refinement before and after applying soft masks (bottom) (G) Local resolution map of the final 3D reconstruction. (H) cryo-EM map and fitting of coordinates. (I) A close-up of the 3' end of the pre-miR-15a substrate recognition by the PAZ domain of Dicer. (J) A close-up of Dicer dsRBD-pre-miR-15a interface in the pre-cleavage state (putative interacting residues are indicated). (K) Dicer in the pre-cleavage state cannot optimally bind long mirtrons or dsRNA due to steric hindrance (indicated by arrows). The models are build based of the cryo-EM structure of Dicer-pre-miR-15a complex, in which pre-miR-15a was replaced by miR-7068 (top) or a 42-bp dsRNA (bottom).



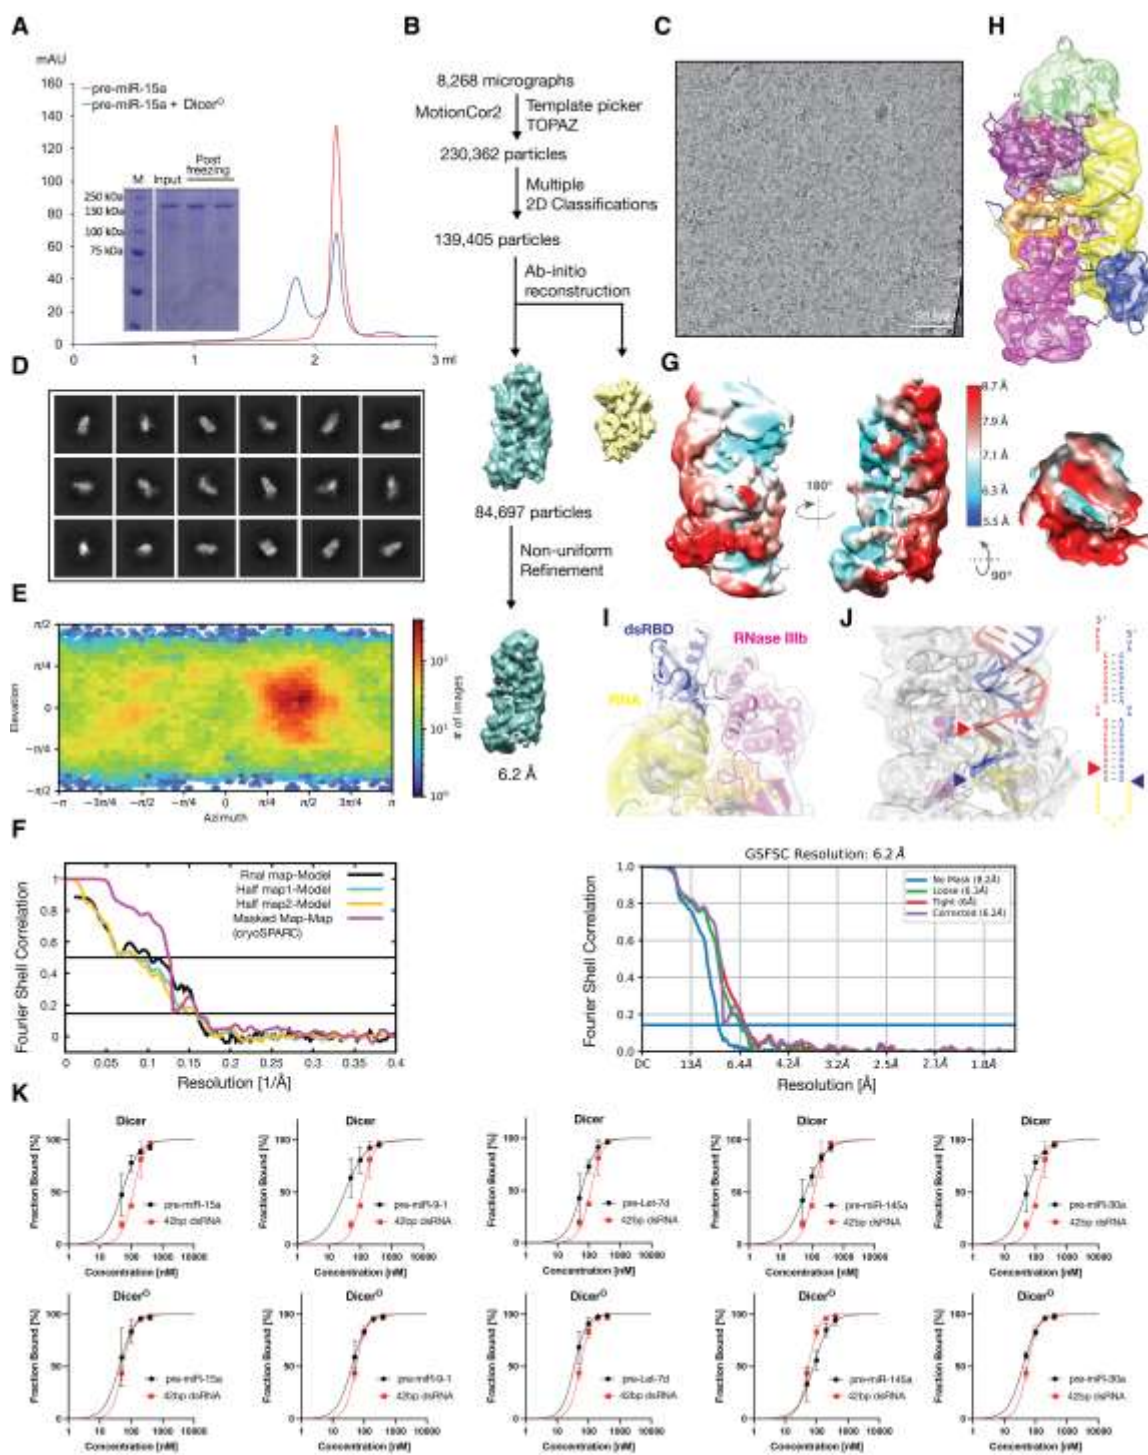

**Figure S6** Reconstitution and cryo-EM analyses of Dicer<sup>O</sup>-pre-miR-15a complex. Related to Figure 5. (A) Gel filtration and SDS analyses of Dicer<sup>O</sup>-pre-miR-15a complex. (B) Outline of the image processing steps used to obtain the 6.2-Å-resolution cryo-EM reconstruction of the Dicer<sup>O</sup>-pre-miR-15a complex. (C) Representative cryo-EM micrograph. (D) Gallery of reference-free 2D class averages. (E) Heat map for distribution of particles for the final 3D reconstruction. (F) Final map FSC (magenta) and map-to-model FSC for the full map (black), half map 1 (cyan), half map 2 (gold) curves (left). FSC curves and resolutions calculated in cryoSPARC during final refinement before and after applying soft masks (right). (G) Local resolution map of the final 3D reconstruction. (H) Structural models superposed to segmented cryo-EM densities and for the PAZ (green), Platform (violet), Ruler (red), RNase IIIa (orange), and RNase IIIb (magenta) domains of Dicer<sup>O</sup> and pre-miR-15a (yellow) are shown. (I) A close-up of dsRBD/RNase IIIb-RNA interface. (J) A close-up of putative RNA cleavage sites (indicated by arrows) and their alignment with Dicer's catalytic sites (in magenta). (K) Quantification of electrophoretic mobility shift assays of Dicer isoforms with different mi-RNA precursors and a 42bp perfect hairpin. Data points, mean ± SD (n=2-3).

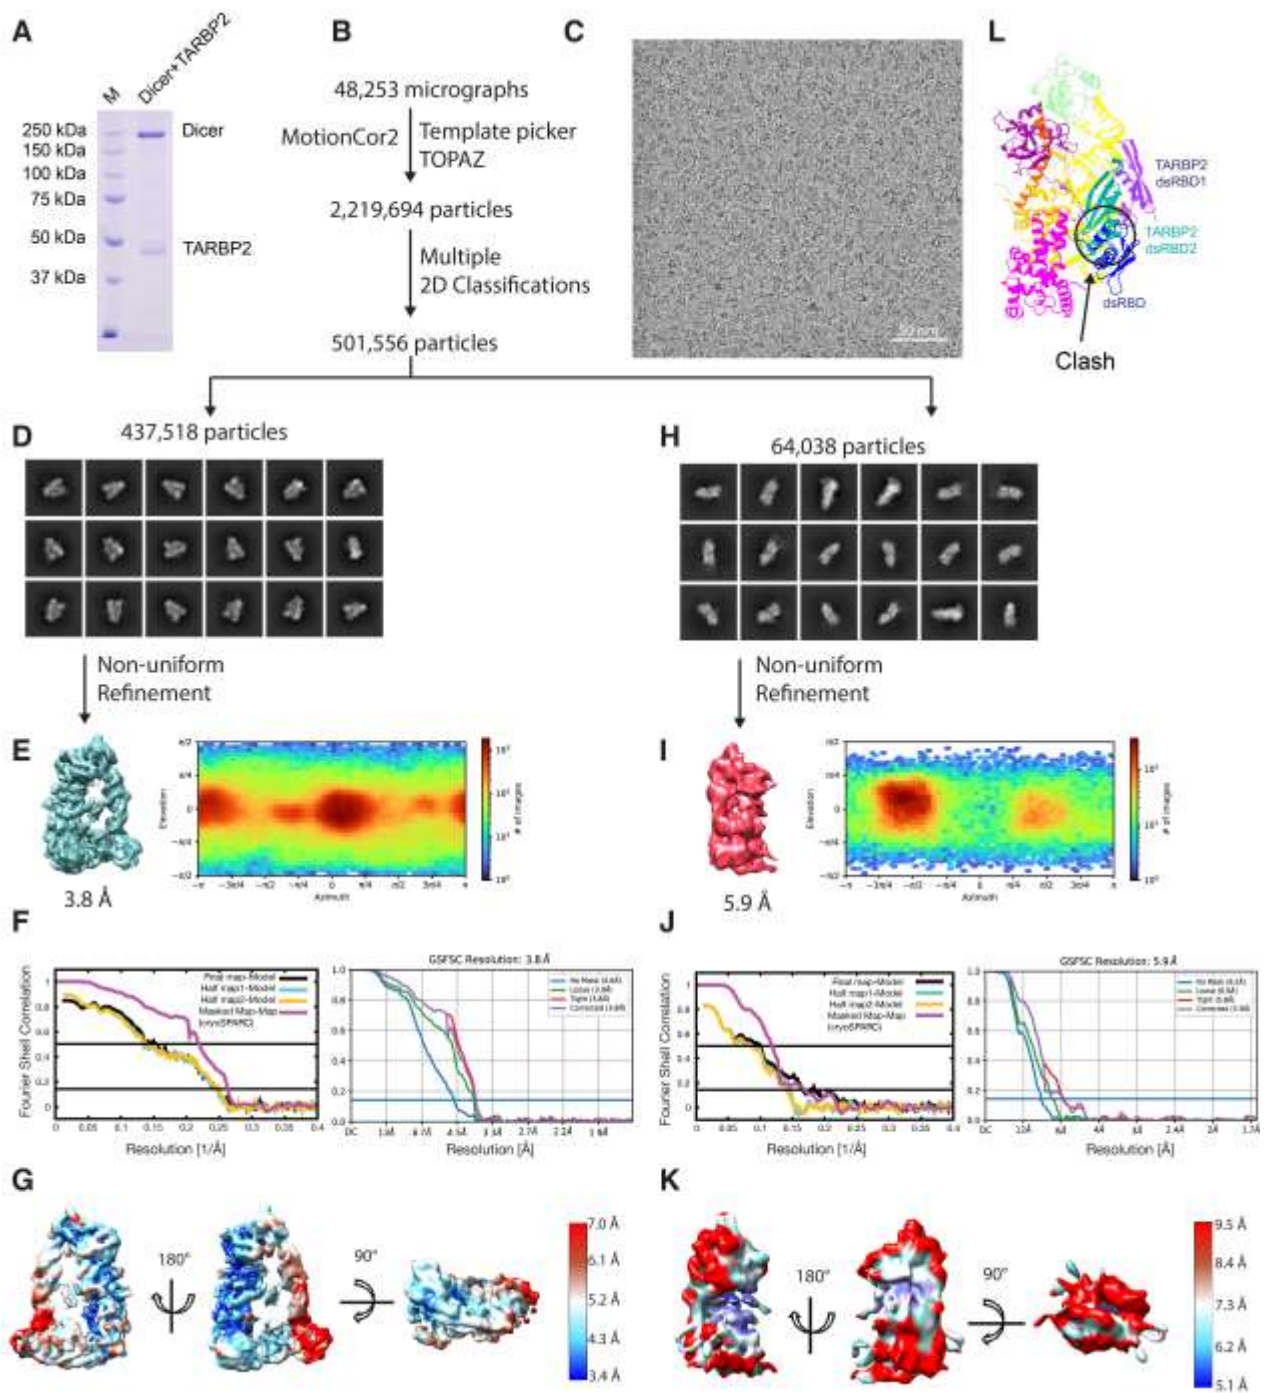

**Figure S7** **Reconstitution and cryo-EM analysis of Dicer-pre-miR-15a-TARBP2 complex.** Related to Figure 6. **(A)** SDS-page analysis of Dicer-pre-miR-15a-TARBP2 complex. **(B)** Outline of the image processing steps of the Dicer-pre-miR-15a-TARBP2 complex. **(C)** Representative cryo-EM micrograph of the ternary complex. **(D)** Gallery of 2D class averages for the pre-cleavage state. **(E)** 3.8-Å-resolution cryo-EM reconstruction of the pre-cleavage state (left). Heat map for distribution of particles for the final 3D reconstruction (right) **(F)** Final map FSC (magenta) and map-to-model FSC for the full map (black), half map 1 (cyan), half map 2 (gold) curves (left). FSC curves and resolutions calculated in cryoSPARC during final refinement before and after applying soft masks (right). **(G)** Local resolution map of the final 3D reconstruction. **(H)** Gallery of 2D class averages for the cleavage state. **(I)** 5.9-Å-resolution cryo-EM reconstruction of the cleavage state (left). Heat map for distribution of particles for the final 3D reconstruction (right). **(J)** Final map FSC (magenta) and map-to-model FSC for the full map (black), half map 1 (cyan), half map 2 (gold) curves (left). FSC curves and resolutions calculated in cryoSPARC during final refinement before and after applying soft masks (right). **(K)** Local resolution map of the final 3D reconstruction. **(L)** Superimposition of pre-miR-15a with TARBP2 dsRBD12 from the pre-cleavage state on the Dicer-pre-miR-15a-TARBP2 structure in the cleavage state.

## SUPPLEMENTARY TABLES

**Table S2** Expression of host genes of most upregulated mirtrons in ESCs. Related to Figure 2.

| host gene       | host gene id          | mRNA<br>baseMean | log2FC | pvalue | padj  | mirtron       |
|-----------------|-----------------------|------------------|--------|--------|-------|---------------|
| <i>Cherp</i>    | ENSMUSG00000052488.7  | 617.8            | 0.845  | 0.004  | 0.377 | mmu-miR-7068  |
| <i>Dbn1</i>     | ENSMUSG00000034675.17 | 52.0             | -0.304 | 0.542  | 1.000 | mmu-miR-6944  |
| <i>Arap3</i>    | ENSMUSG00000024451.8  | 10.4             | 0.614  | 0.358  | 1.000 | mmu-miR-6981  |
| <i>Fbrs</i>     | ENSMUSG00000042423.9  | 197.3            | 0.219  | 0.520  | 1.000 | mmu-miR-7060  |
| <i>Dennd6b</i>  | ENSMUSG00000015377.9  | 163.9            | 0.105  | 0.791  | 1.000 | mmu-miR-6958  |
| <i>Gfra4</i>    | ENSMUSG00000027316.15 | 11.4             | -0.720 | 0.280  | 1.000 | mmu-miR-6973b |
| <i>Fbxw9</i>    | ENSMUSG00000008167.14 | 711.2            | 0.223  | 0.536  | 1.000 | mmu-miR-7070  |
| <i>Hspg2</i>    | ENSMUSG00000028763.17 | 2418.0           | -0.348 | 0.264  | 1.000 | mmu-miR-7018  |
| <i>Nav1</i>     | ENSMUSG00000009418.15 | 451.2            | 0.807  | 0.006  | 0.499 | mmu-miR-1231  |
| <i>Atp2b4</i>   | ENSMUSG00000026463.17 | 275.5            | -1.178 | 0.003  | 0.351 | mmu-miR-6903  |
| <i>Arhgef17</i> | ENSMUSG00000032875.8  | 301.1            | -0.549 | 0.085  | 1.000 | mmu-miR-3102  |
| <i>Etfb</i>     | ENSMUSG00000004610.4  | 666.6            | -0.477 | 0.121  | 1.000 | mmu-miR-7051  |
| <i>Ptprs</i>    | ENSMUSG00000013236.17 | 602.1            | 0.012  | 0.971  | 1.000 | mmu-miR-6977  |
| <i>Rrp1</i>     | ENSMUSG00000061032.9  | 1706.2           | -0.101 | 0.757  | 1.000 | mmu-miR-6907  |
| <i>Myh3</i>     | ENSMUSG00000020908.14 | 27.6             | -0.389 | 0.473  | 1.000 | mmu-miR-6923  |
| <i>Baiap3</i>   | ENSMUSG00000047507.12 | 4.4              | -0.270 | 0.733  | 1.000 | mmu-miR-3547  |
| <i>Ciao3</i>    | ENSMUSG00000002280.10 | 367.9            | -0.313 | 0.296  | 1.000 | mmu-miR-6966  |
| <i>Hip1r</i>    | ENSMUSG00000000915.15 | 189.2            | 0.241  | 0.499  | 1.000 | mmu-miR-7032  |
| <i>Farsa</i>    | ENSMUSG00000003808.18 | 1774.8           | 0.373  | 0.228  | 1.000 | mmu-miR-7069  |
| <i>Mst1</i>     | ENSMUSG00000032591.15 | 93.0             | -0.334 | 0.458  | 1.000 | mmu-miR-7088  |
| <i>Ap2a2</i>    | ENSMUSG00000002957.11 | 2406.3           | 0.011  | 0.972  | 1.000 | mmu-miR-7063  |
| <i>Dnase1l1</i> | ENSMUSG00000019088.13 | 27.5             | -0.661 | 0.207  | 1.000 | mmu-miR-7091  |

**Table S3 Asymmetric cleavage of miRNAs.** Related to Figure 3. Shown are frequencies of specific miRNA fragments in RNA-sequencing data from *Dicer*<sup>*ΔHELI/ΔHELI*</sup> ESCs. The fragment miR-5p+loop is produced by asymmetric cleave at the 5' end of 3p miRNA.

| miRNA              | miR-5p        | loop          | miR-3p        | miR-5p+loop   | miR-3p+loop   |
|--------------------|---------------|---------------|---------------|---------------|---------------|
| mmu-miR-7041       | 0.0000        | 0.0000        | 0.6667        | 0.3333        | 0.0000        |
| mmu-miR-7067       | 0.0000        | 0.0000        | 0.3333        | 0.3333        | 0.0000        |
| mmu-miR-667        | 0.5358        | 0.0037        | 0.0838        | 0.3322        | 0.0000        |
| mmu-miR-31         | 0.5807        | 0.0000        | 0.0519        | 0.2948        | 0.0031        |
| mmu-miR-29c        | 0.1667        | 0.0000        | 0.1667        | 0.2222        | 0.0000        |
| mmu-miR-101b       | 0.0000        | 0.0000        | 0.8350        | 0.1456        | 0.0012        |
| mmu-miR-465b       | 0.5317        | 0.0000        | 0.3394        | 0.1106        | 0.0000        |
| mmu-miR-465b       | 0.5317        | 0.0000        | 0.3394        | 0.1106        | 0.0000        |
| mmu-miR-539        | 0.2650        | 0.2222        | 0.0513        | 0.0769        | 0.0256        |
| mmu-miR-154        | 0.2100        | 0.0284        | 0.6601        | 0.0664        | 0.0002        |
| mmu-miR-3070       | 0.2405        | 0.0000        | 0.6881        | 0.0476        | 0.0000        |
| mmu-miR-465c       | 0.5198        | 0.0000        | 0.4097        | 0.0407        | 0.0000        |
| mmu-miR-465c       | 0.5198        | 0.0000        | 0.4097        | 0.0407        | 0.0000        |
| mmu-miR-142a       | 0.3436        | 0.0082        | 0.3154        | 0.0402        | 0.0000        |
| mmu-miR-377        | 0.5106        | 0.0000        | 0.4012        | 0.0359        | 0.0000        |
| mmu-miR-367        | 0.0000        | 0.0827        | 0.7694        | 0.0351        | 0.0000        |
| mmu-miR-878        | 0.6171        | 0.0000        | 0.2904        | 0.0334        | 0.0000        |
| mmu-miR-293        | 0.2776        | 0.0000        | 0.6612        | 0.0291        | 0.0001        |
| <b>mmu-miR-15a</b> | <b>0.0193</b> | <b>0.0078</b> | <b>0.8588</b> | <b>0.0270</b> | <b>0.0000</b> |
| mmu-miR-141        | 0.1689        | 0.1947        | 0.3683        | 0.0264        | 0.0034        |
| mmu-miR-324        | 0.0620        | 0.0361        | 0.8431        | 0.0250        | 0.0000        |
| mmu-miR-883b       | 0.5185        | 0.0000        | 0.4577        | 0.0238        | 0.0000        |
| mmu-miR-376b       | 0.0291        | 0.0173        | 0.9008        | 0.0235        | 0.0000        |
| mmu-miR-485        | 0.3695        | 0.0001        | 0.5528        | 0.0214        | 0.0146        |
| mmu-miR-20b        | 0.9475        | 0.0006        | 0.0089        | 0.0199        | 0.0004        |
| mmu-miR-743b       | 0.0394        | 0.0000        | 0.9235        | 0.0185        | 0.0000        |
| mmu-miR-665        | 0.0400        | 0.0000        | 0.8164        | 0.0176        | 0.0820        |
| mmu-miR-679        | 0.7761        | 0.0000        | 0.0568        | 0.0167        | 0.0000        |
| mmu-miR-465a       | 0.0921        | 0.0000        | 0.8556        | 0.0143        | 0.0057        |
| mmu-miR-181c       | 0.0812        | 0.0000        | 0.8520        | 0.0140        | 0.0000        |
| mmu-miR-188        | 0.9352        | 0.0139        | 0.0000        | 0.0139        | 0.0000        |
| mmu-miR-411        | 0.7924        | 0.0023        | 0.1631        | 0.0139        | 0.0000        |
| mmu-miR-93         | 0.9053        | 0.0019        | 0.0396        | 0.0135        | 0.0000        |
| mmu-miR-301a       | 0.5232        | 0.0067        | 0.1228        | 0.0133        | 0.0000        |
| mmu-miR-362        | 0.4786        | 0.0000        | 0.4550        | 0.0130        | 0.0000        |
| mmu-miR-341        | 0.0241        | 0.0000        | 0.8388        | 0.0121        | 0.0003        |
| mmu-miR-380        | 0.3384        | 0.0000        | 0.5523        | 0.0115        | 0.0000        |
| mmu-miR-211        | 0.8401        | 0.0000        | 0.1078        | 0.0109        | 0.0021        |
| mmu-miR-29a        | 0.0085        | 0.0000        | 0.9267        | 0.0096        | 0.0000        |
| mmu-miR-677        | 0.2121        | 0.0000        | 0.0004        | 0.0089        | 0.0025        |



**Table S4 Cryo-EM data collection and refinement statistics.** Related to Figure 4-6.

| <b>Instrument</b>                               |                 |            |                         |                                 |                             |
|-------------------------------------------------|-----------------|------------|-------------------------|---------------------------------|-----------------------------|
| Microscope                                      | FEI Titan Krios |            |                         |                                 |                             |
| <b>Data collection</b>                          |                 |            |                         |                                 |                             |
| Sample                                          | Dicer           | Dicer-RNA  | Dicer <sup>o</sup> -RNA | Dicer-RNA-TARBP2 (pre-cleavage) | Dicer-RNA-TARBP2 (cleavage) |
| EMDB accession number                           | EMD-14387       | EMD-14383  | EMDB-14384              | EMDB-14856                      | EMDB-14854                  |
| PDB accession number                            | 7YZ4            | 7YYM       | 7YYN                    | 7ZPK                            | 7ZPI                        |
| Voltage (kV)                                    | 300             | 300        | 300                     | 300                             | 300                         |
| Detector (counting mode)                        | Gatan K2        | Gatan K2   | Gatan K2                | Gatan K3                        | Gatan K3                    |
| Symmetry                                        | C1              | C1         | C1                      | C1                              | C1                          |
| Electron dose (e <sup>-</sup> /Å <sup>2</sup> ) | 55.0            | 55.0       | 55.0                    | 60.198                          | 60.198                      |
| Defocus range (µm)                              | -0.8 to -3.5    | -1 to -3.5 | -1 to -3.5              | -0.8 to -3.5                    | -0.8 to -3.5                |
| Pixel size (Å)                                  | 0.828           | 0.828      | 0.828                   | 0.835                           | 0.835                       |
| Movies collected                                | 6,354           | 16,601     | 9,956                   | 48,253                          | 48,253                      |
| Initial particles                               | 862,842         | 1,212,966  | 230,362                 | 2,219,694                       | 2,219,694                   |
| Final particles                                 | 92,906          | 154,665    | 84,697                  | 437,518                         | 64,038                      |
| <b>Model composition</b>                        |                 |            |                         |                                 |                             |
| Protein residues                                | 1234            | 1281       | 705                     | 1513                            | 705                         |
| <b>Refinement</b>                               |                 |            |                         |                                 |                             |
| Map resolution (cryoSPARC) 0.143/0.5 (Å)        | 3.8/4.6         | 4.2/5.8    | 6.2/7.9                 | 3.8/4.5                         | 5.9/8.4                     |
| Map-to-model FSC 0.143/0.5 (Å)                  | 3.9/7.3         | 4.3/6.7    | 6.3/9.7                 | 4.0/6.5                         | 6.0/9.7                     |
| Combined map resolution range (Å)               | 3.5 – 4.2       | -          | -                       | -                               | -                           |
| Map sharpening B-factor (Å <sup>2</sup> )       | 87.8            | 134.8      | 451.4                   | 189.2                           | 520.0                       |
| <b>R.m.s deviations</b>                         |                 |            |                         |                                 |                             |
| Bond lengths (Å)                                | 0.004           | 0.004      | 0.013                   | 0.005                           | 0.004                       |
| Bond angles (°)                                 | 0.780           | 0.798      | 1.917                   | 1.089                           | 0.290                       |
| <b>Validation</b>                               |                 |            |                         |                                 |                             |
| MolProbity score                                | 1.12            | 1.07       | 0.78                    | 1.15                            | 0.70                        |
| Clashscore                                      | 1.46            | 1.57       | 0.92                    | 2.24                            | 0.61                        |
| Poor rotamers (%)                               | 0.92            | 0.18       | 0.64                    | 0.68                            | 0.64                        |
| <b>Ramachandran plot</b>                        |                 |            |                         |                                 |                             |
| Favored (%)                                     | 96.44           | 97.07      | 98.70                   | 97.18                           | 97.44                       |
| Allowed (%)                                     | 3.56            | 2.93       | 1.30                    | 2.82                            | 2.56                        |
| Disallowed (%)                                  | 0.00            | 0.00       | 0.00                    | 0.00                            | 0.00                        |

**Table S5 RNA-seq libraries used in the study.** Related to Figure 1-3 and STAR Methods (Method Details, section Bioinformatics analyses).

| stage | type      | genotype                            | library name                   | note                   |
|-------|-----------|-------------------------------------|--------------------------------|------------------------|
| ESC   | small RNA | <i>Dicer</i> <sup>wt/wt</sup>       | s_ESC_WT+MosIR_RS7.1           | transfected with MosIR |
| ESC   | small RNA | <i>Dicer</i> <sup>wt/wt</sup>       | s_ESC_WT+MosIR_RS7.2           | transfected with MosIR |
| ESC   | small RNA | <i>Dicer</i> <sup>wt/wt</sup>       | s_ESC_WT+MosIR_RS7.3           | transfected with MosIR |
| ESC   | small RNA | <i>Dicer</i> <sup>ΔHEL1/ΔHEL1</sup> | s_ESC_XHOM+MosIR_RS10.1        | transfected with MosIR |
| ESC   | small RNA | <i>Dicer</i> <sup>ΔHEL1/ΔHEL1</sup> | s_ESC_XHOM+MosIR_RS10.2        | transfected with MosIR |
| ESC   | small RNA | <i>Dicer</i> <sup>ΔHEL1/ΔHEL1</sup> | s_ESC_XHOM+MosIR_RS10.3        | transfected with MosIR |
| E15.5 | small RNA | <i>Dicer</i> <sup>wt/wt</sup>       | s_E15.5_WT_1                   |                        |
| E15.5 | small RNA | <i>Dicer</i> <sup>wt/wt</sup>       | s_E15.5_WT_6                   |                        |
| E15.5 | small RNA | <i>Dicer</i> <sup>wt/wt</sup>       | s_E15.5_WT_8B                  |                        |
| E15.5 | small RNA | <i>Dicer</i> <sup>ΔHEL1/ΔHEL1</sup> | s_E15.5_XHOM_10B_r2            |                        |
| E15.5 | small RNA | <i>Dicer</i> <sup>ΔHEL1/ΔHEL1</sup> | s_E15.5_XHOM_2                 |                        |
| E15.5 | small RNA | <i>Dicer</i> <sup>ΔHEL1/ΔHEL1</sup> | s_E15.5_XHOM_3B                |                        |
| E15.5 | small RNA | <i>Dicer</i> <sup>ΔHEL1/ΔHEL1</sup> | s_E15.5_XHOM_4                 |                        |
| E15.5 | small RNA | <i>Dicer</i> <sup>ΔHEL1/ΔHEL1</sup> | s_E15.5_XHOM_7B                |                        |
| E15.5 | small RNA | <i>Dicer</i> <sup>wt/wt</sup>       | s_E15.5_WT_11                  |                        |
| E15.5 | small RNA | <i>Dicer</i> <sup>wt/wt</sup>       | s_E15.5_WT_14                  |                        |
| E15.5 | small RNA | <i>Dicer</i> <sup>wt/wt</sup>       | s_E15.5_WT_16                  |                        |
| E15.5 | small RNA | <i>Dicer</i> <sup>GNT/GNT</sup>     | s_E15.5_GNTHOM_3               |                        |
| E15.5 | small RNA | <i>Dicer</i> <sup>GNT/GNT</sup>     | s_E15.5_GNTHOM_4               |                        |
| E15.5 | small RNA | <i>Dicer</i> <sup>GNT/GNT</sup>     | s_E15.5_GNTHOM_9               |                        |
| E15.5 | small RNA | <i>Tarbp2</i> <sup>+/+</sup>        | SRS2781156 B6T2-65Tarbp2_WT_1  | PRJNA423238 SRP127346  |
| E15.5 | small RNA | <i>Tarbp2</i> <sup>+/+</sup>        | SRS2781151 B6T2-65Tarbp2_WT_2  | PRJNA423238 SRP127346  |
| E15.5 | small RNA | <i>Tarbp2</i> <sup>+/+</sup>        | SRS2781150B6T2-65Tarbp2_WT_3   | PRJNA423238 SRP127346  |
| E15.5 | small RNA | <i>Tarbp2</i> <sup>-/-</sup>        | SRS2781155 B6T2-54Tarbp2_Mut_1 | PRJNA423238 SRP127346  |
| E15.5 | small RNA | <i>Tarbp2</i> <sup>-/-</sup>        | SRS2781154 B6T2-60Tarbp2_Mut_2 | PRJNA423238 SRP127346  |
| E15.5 | small RNA | <i>Tarbp2</i> <sup>-/-</sup>        | SRS2781157 B6T2-90Tarbp2_Mut_3 | PRJNA423238 SRP127346  |

## References

1. Taborska, E., Pasulka, J., Malik, R., Horvat, F., Jenickova, I., Jelic Matosevic, Z., and Svoboda, P. (2019). Restricted and non-essential redundancy of RNAi and piRNA pathways in mouse oocytes. *PLoS Genet* 15, e1008261. 10.1371/journal.pgen.1008261.
2. Fromm, B., Hoye, E., Domanska, D., Zhong, X., Aparicio-Puerta, E., Ovchinnikov, V., Umu, S.U., Chabot, P.J., Kang, W., Aslanzadeh, M., et al. (2022). MirGeneDB 2.1: toward a complete sampling of all major animal phyla. *Nucleic Acids Res* 50, D204-D210. 10.1093/nar/gkab1101.
3. Ladewig, E., Okamura, K., Flynt, A.S., Westholm, J.O., and Lai, E.C. (2012). Discovery of hundreds of mirtrons in mouse and human small RNA data. *Genome Res* 22, 1634-1645. 10.1101/gr.133553.111.
4. Flemr, M., Malik, R., Franke, V., Nejepinska, J., Sedlacek, R., Vlahovicek, K., and Svoboda, P. (2013). A retrotransposon-driven dicer isoform directs endogenous small interfering RNA production in mouse oocytes. *Cell* 155, 807-816. 10.1016/j.cell.2013.10.001.
